# Supplementary material for: A Genome-Scale Metabolic Model of Anabaena 33047 to Guide Genetic Modifications to Overproduce Nylon Monomers
Source: MDPI journal article supplement (doi:10.3390/metabo11030168), 2021-03-15
Supplement: s1 [file s1]

## Independent Section

Contains tests that are independent of the class of modeled organism, a model's complexity or types of identifiers that are used to describe its components. Parameterization or initialization of the network is not required. See readme for more details.

### Consistency

|                                  |        |   |
|----------------------------------|--------|---|
| Stoichiometric Consistency       | 99.1%  | ⬇ |
| Mass Balance                     | 97.4%  | ⬇ |
| Charge Balance                   | 100.0% | ⬇ |
| Metabolite Connectivity          | 100.0% | ⬇ |
| Unbounded Flux In Default Medium | 100.0% | ⬇ |

|           |     |   |
|-----------|-----|---|
| Sub Total | 99% | ⬇ |
|-----------|-----|---|

### Annotation - Metabolites

|                                               |        |   |
|-----------------------------------------------|--------|---|
| Presence of Metabolite Annotation             | 100.0% | ⬇ |
| Metabolite Annotations Per Database           | Info   | ⬇ |
| pubchem.compound                              | 0.0%   | ⬇ |
| kegg.compound                                 | 0.0%   | ⬇ |
| seed.compound                                 | 96.4%  | ⬇ |
| inchikey                                      | 0.0%   | ⬇ |
| inchi                                         | 0.0%   | ⬇ |
| chebi                                         | 0.0%   | ⬇ |
| hmdb                                          | 0.0%   | ⬇ |
| reactome                                      | 0.0%   | ⬇ |
| metanetx.chemical                             | 0.0%   | ⬇ |
| bigg.metabolite                               | 0.0%   | ⬇ |
| biocyc                                        | 0.0%   | ⬇ |
| Metabolite Annotation Conformity Per Database | Info   | ⬇ |
| pubchem.compound                              | 0.0%   | ⬇ |
| kegg.compound                                 | 0.0%   | ⬇ |
| seed.compound                                 | 100.0% | ⬇ |
| inchikey                                      | 0.0%   | ⬇ |
| inchi                                         | 0.0%   | ⬇ |
| chebi                                         | 0.0%   | ⬇ |
| hmdb                                          | 0.0%   | ⬇ |
| reactome                                      | 0.0%   | ⬇ |
| metanetx.chemical                             | 0.0%   | ⬇ |
| bigg.metabolite                               | 0.0%   | ⬇ |
| biocyc                                        | 0.0%   | ⬇ |
| Uniform Metabolite Identifier Namespace       | 0.0%   | ⬇ |

|           |     |   |
|-----------|-----|---|
| Sub Total | 29% | ⬇ |
|-----------|-----|---|

### Annotation - Reactions

|                                             |        |   |
|---------------------------------------------|--------|---|
| Presence of Reaction Annotation             | 100.0% | ⬇ |
| Reaction Annotations Per Database           | Info   | ⬇ |
| rhea                                        | 0.0%   | ⬇ |
| kegg.reaction                               | 0.0%   | ⬇ |
| seed.reaction                               | 86.0%  | ⬇ |
| metanetx.reaction                           | 0.0%   | ⬇ |
| bigg.reaction                               | 0.0%   | ⬇ |
| reactome                                    | 0.0%   | ⬇ |
| ec-code                                     | 0.0%   | ⬇ |
| brenda                                      | 0.0%   | ⬇ |
| biocyc                                      | 0.0%   | ⬇ |
| Reaction Annotation Conformity Per Database | Info   | ⬇ |
| rhea                                        | 0.0%   | ⬇ |
| kegg.reaction                               | 0.0%   | ⬇ |
| seed.reaction                               | 100.0% | ⬇ |
| metanetx.reaction                           | 0.0%   | ⬇ |
| bigg.reaction                               | 0.0%   | ⬇ |
| reactome                                    | 0.0%   | ⬇ |
| ec-code                                     | 0.0%   | ⬇ |
| brenda                                      | 0.0%   | ⬇ |
| biocyc                                      | 0.0%   | ⬇ |
| Uniform Reaction Identifier Namespace       | 97.6%  | ⬇ |

|           |     |   |
|-----------|-----|---|
| Sub Total | 55% | ⬇ |
|-----------|-----|---|

### Annotation - Genes

|                                         |        |   |
|-----------------------------------------|--------|---|
| Presence of Gene Annotation             | 100.0% | ⬇ |
| Gene Annotations Per Database           | Info   | ⬇ |
| refseq                                  | 0.0%   | ⬇ |
| uniprot                                 | 0.0%   | ⬇ |
| ecogene                                 | 0.0%   | ⬇ |
| kegg.genes                              | 0.0%   | ⬇ |
| ncbigi                                  | 0.0%   | ⬇ |
| ncbigene                                | 0.0%   | ⬇ |
| ncbiprotein                             | 100.0% | ⬇ |
| ccds                                    | 0.0%   | ⬇ |
| hprd                                    | 0.0%   | ⬇ |
| asap                                    | 0.0%   | ⬇ |
| Gene Annotation Conformity Per Database | Info   | ⬇ |
| refseq                                  | 0.0%   | ⬇ |
| uniprot                                 | 0.0%   | ⬇ |
| ecogene                                 | 0.0%   | ⬇ |
| kegg.genes                              | 0.0%   | ⬇ |
| ncbigi                                  | 0.0%   | ⬇ |
| ncbigene                                | 0.0%   | ⬇ |
| ncbiprotein                             | 98.0%  | ⬇ |
| ccds                                    | 0.0%   | ⬇ |
| hprd                                    | 0.0%   | ⬇ |
| asap                                    | 0.0%   | ⬇ |

|           |     |   |
|-----------|-----|---|
| Sub Total | 40% | ⬇ |
|-----------|-----|---|

### Annotation - SBO Terms

|                                         |         |   |
|-----------------------------------------|---------|---|
| Metabolite General SBO Presence         | 100.0%  | ⬇ |
| Metabolite SBO:0000247 Presence         | 100.0%  | ⬇ |
| Reaction General SBO Presence           | 100.0%  | ⬇ |
| Metabolic Reaction SBO:0000176 Presence | 100.0%  | ⬇ |
| Transport Reaction SBO:0000185 Presence | 88.6%   | ⬇ |
| Exchange Reaction SBO:0000627 Presence  | 100.0%  | ⬇ |
| Demand Reaction SBO:0000628 Presence    | 100.0%  | ⬇ |
| Sink Reactions SBO:0000632 Presence     | Skipped | ⬇ |
| Gene General SBO Presence               | 0.0%    | ⬇ |
| Gene SBO:0000243 Presence               | 0.0%    | ⬇ |
| Biomass Reactions SBO:0000629 Presence  | 100.0%  | ⬇ |

|           |     |   |
|-----------|-----|---|
| Sub Total | 72% | ⬇ |
|-----------|-----|---|

|             |     |   |
|-------------|-----|---|
| Total Score | 76% | ⬇ |
|-------------|-----|---|

Total Score

76%

Score per Category Export

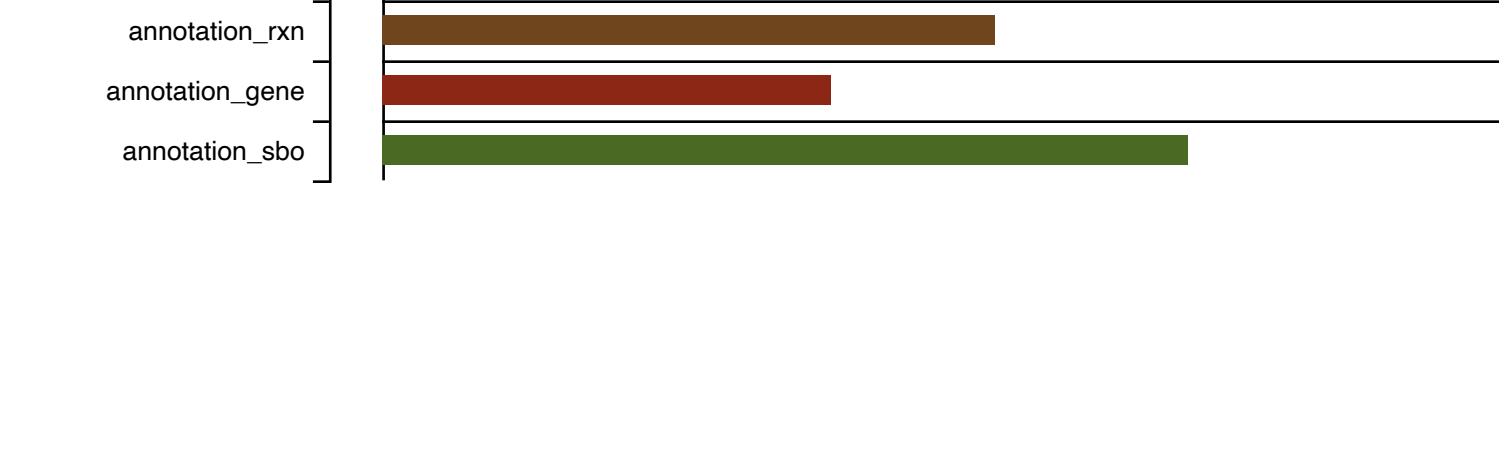

## Specific Section

Covers general statistics and specific aspects of a metabolic network that are not universally applicable. See readme for more details.

### SBML

|                        |         |   |
|------------------------|---------|---|
| SBML Level and Version | Errored | ⬇ |
| FBC enabled            | Errored | ⬇ |

### Basic Information

|                    |                                            |   |
|--------------------|--------------------------------------------|---|
| Model Identifier   | Two_cell_model_reduction_level_10_merge_ex | ⬇ |
| Total Metabolites  | 1,811                                      | ⬇ |
| Total Reactions    | 1,845                                      | ⬇ |
| Total Genes        | 892                                        | ⬇ |
| Total Compartments | 9                                          | ⬇ |
| Metabolic Coverage | 2.07                                       | ⬇ |

### Metabolite Information

|                                                 |       |   |
|-------------------------------------------------|-------|---|
| Unique Metabolites                              | 1,811 | ⬇ |
| Duplicate Metabolites in Identical Compartments | 0     | ⬇ |
| Metabolites without Charge                      | 0     | ⬇ |
| Metabolites without Formula                     | 0     | ⬇ |
| Medium Components                               | 19    | ⬇ |

### Reaction Information

|                                                           |       |   |
|-----------------------------------------------------------|-------|---|
| Purely Metabolic Reactions                                | 1,577 | ⬇ |
| Purely Metabolic Reactions with Constraints               | 2     | ⬇ |
| Transport Reactions                                       | 202   | ⬇ |
| Transport Reactions with Constraints                      | 0     | ⬇ |
| Thermodynamic Reversibility of Purely Metabolic Reactions | 1.00  | ⬇ |
| Reactions With Partially Identical Annotations            | 0.00  | ⬇ |
| Duplicate Reactions                                       | 0.00  | ⬇ |
| Reactions With Identical Genes                            | 0.90  | ⬇ |

### Gene-Protein-Reaction (GPR) Associations

|                                             |      |   |
|---------------------------------------------|------|---|
| Reactions without GPR                       | 131  | ⬇ |
| Fraction of Transport Reactions without GPR | 0.54 | ⬇ |
| Enzyme Complexes                            | 150  | ⬇ |

### Biomass

|                              |      |   |
|------------------------------|------|---|
| Biomass Reactions Identified | 20   | ⬇ |
| Biomass Consistency          | Info | ⬇ |
| Cellwall_biomass__hc         | 0.37 | ⬇ |
| Cellwall_biomass__vc         | 0.37 | ⬇ |
| DNA_biomass__hc              | 1.00 | ⬇ |
| DNA_biomass__vc              | 1.00 | ⬇ |
| Inorganicions_biomass__hc    | 1.00 | ⬇ |
| Inorganicions_biomass__vc    | 1.00 | ⬇ |
| Lipid_biomass__hc            | 0.00 | ⬇ |
| Lipid_biomass__vc            | 0.00 | ⬇ |
| Pigment_biomass__hc          | 0.98 | ⬇ |
| Pigment_biomass__vc          | 0.98 | ⬇ |
| Prot_biomass__hc             | 1.01 | ⬇ |
| Prot_biomass__vc             | 1.01 | ⬇ |
| RNA_biomass__hc              | 1.00 | ⬇ |
| RNA_biomass__vc              | 1.00 | ⬇ |
| Solpool_biomass__hc          | 0.28 | ⬇ |
| Solpool_biomass__vc          | 0.28 | ⬇ |
| biomass_eq_33047__hc         | 0.12 | ⬇ |
| biomass_eq_33047__vc         | 0.12 | ⬇ |
| carb_biomass__hc             | 0.16 | ⬇ |
| carb_biomass__vc             | 0.16 | ⬇ |

|                                      |      |   |
|--------------------------------------|------|---|
| Biomass Production In Default Medium | Info | ⬇ |
| Cellwall_biomass__hc                 | 0.00 | ⬇ |
| Cellwall_biomass__vc                 | 0.00 | ⬇ |
| DNA_biomass__hc                      | 0.00 | ⬇ |
| DNA_biomass__vc                      | 0.00 | ⬇ |
| Inorganicions_biomass__hc            | 0.00 | ⬇ |
| Inorganicions_biomass__vc            | 0.00 | ⬇ |
| Lipid_biomass__hc                    | 0.02 | ⬇ |
| Lipid_biomass__vc                    | 0.02 | ⬇ |
| Pigment_biomass__hc                  | 0.01 | ⬇ |
| Pigment_biomass__vc                  | 0.01 | ⬇ |
| Prot_biomass__hc                     | 0.10 | ⬇ |
| Prot_biomass__vc                     | 0.10 | ⬇ |
| RNA_biomass__hc                      | 0.02 | ⬇ |
| RNA_biomass__vc                      | 0.02 | ⬇ |
| Solpool_biomass__hc                  | 0.01 | ⬇ |
| Solpool_biomass__vc                  | 0.01 | ⬇ |
| biomass_eq_33047__hc                 | 0.24 | ⬇ |
| biomass_eq_33047__vc                 | 0.24 | ⬇ |
| carb_biomass__hc                     | 0.32 | ⬇ |
| carb_biomass__vc                     | 0.32 | ⬇ |

|                                           |       |   |
|-------------------------------------------|-------|---|
| Unrealistic Growth Rate In Default Medium | Info  | ⬇ |
| Cellwall_biomass__hc                      | false | ⬇ |
| Cellwall_biomass__vc                      | false | ⬇ |
| DNA_biomass__hc                           | false | ⬇ |
| DNA_biomass__vc                           | false | ⬇ |
| Inorganicions_biomass__hc                 | false | ⬇ |
| Inorganicions_biomass__vc                 | false | ⬇ |
| Lipid_biomass__hc                         | false | ⬇ |
| Lipid_biomass__vc                         | false | ⬇ |
| Pigment_biomass__hc                       | false | ⬇ |
| Pigment_biomass__vc                       | false | ⬇ |
| Prot_biomass__hc                          | false | ⬇ |
| Prot_biomass__vc                          | false | ⬇ |
| RNA_biomass__hc                           | false | ⬇ |
| RNA_biomass__vc                           | false | ⬇ |
| Solpool_biomass__hc                       | false | ⬇ |
| Solpool_biomass__vc                       | false | ⬇ |
| biomass_eq_33047__hc                      | false | ⬇ |
| biomass_eq_33047__vc                      | false | ⬇ |
| carb_biomass__hc                          | false | ⬇ |
| carb_biomass__vc                          | false | ⬇ |

|                                       |       |   |
|---------------------------------------|-------|---|
| Biomass Production In Complete Medium | Info  | ⬇ |
| Cellwall_biomass__hc                  | 0.00  | ⬇ |
| Cellwall_biomass__vc                  | 0.00  | ⬇ |
| DNA_biomass__hc                       | 0.10  | ⬇ |
| DNA_biomass__vc                       | 0.10  | ⬇ |
| Inorganicions_biomass__hc             | 0.20  | ⬇ |
| Inorganicions_biomass__vc             | 0.20  | ⬇ |
| Lipid_biomass__hc                     | 2.00  | ⬇ |
| Lipid_biomass__vc                     | 2.00  | ⬇ |
| Pigment_biomass__hc                   | 0.50  | ⬇ |
| Pigment_biomass__vc                   | 0.50  | ⬇ |
| Prot_biomass__hc                      | 9.14  | ⬇ |
| Prot_biomass__vc                      | 9.14  | ⬇ |
| RNA_biomass__hc                       | 1.80  | ⬇ |
| RNA_biomass__vc                       | 1.80  | ⬇ |
| Solpool_biomass__hc                   | 0.57  | ⬇ |
| Solpool_biomass__vc                   | 0.57  | ⬇ |
| biomass_eq_33047__hc                  | 20.94 | ⬇ |
| biomass_eq_33047__vc                  | 20.94 | ⬇ |
| carb_biomass__hc                      | 27.93 | ⬇ |
| carb_biomass__vc                      | 27.93 | ⬇ |

|                                              |         |   |
|----------------------------------------------|---------|---|
| Blocked Biomass Precursors In Default Medium | Info    | ⬇ |
| Cellwall_biomass__hc                         | Errored | ⬇ |
| Cellwall_biomass__vc                         | Errored | ⬇ |
| DNA_biomass__hc                              | Errored | ⬇ |
| DNA_biomass__vc                              | Errored | ⬇ |
| Inorganicions_biomass__hc                    | Errored | ⬇ |
| Inorganicions_biomass__vc                    | Errored | ⬇ |
| Lipid_biomass__hc                            | Errored | ⬇ |
| Lipid_biomass__vc                            | Errored | ⬇ |
| Pigment_biomass__hc                          | Errored | ⬇ |
| Pigment_biomass__vc                          | Errored | ⬇ |
| Prot_biomass__hc                             | Errored | ⬇ |
| Prot_biomass__vc                             | Errored | ⬇ |
| RNA_biomass__hc                              | Errored | ⬇ |
| RNA_biomass__vc                              | Errored | ⬇ |
| Solpool_biomass__hc                          | Errored | ⬇ |
| Solpool_biomass__vc                          | Errored | ⬇ |
| biomass_eq_33047__hc                         | Errored | ⬇ |
| biomass_eq_33047__vc                         | Errored | ⬇ |
| carb_biomass__hc                             | Errored | ⬇ |
| carb_biomass__vc                             | Errored | ⬇ |

|                                               |         |   |
|-----------------------------------------------|---------|---|
| Blocked Biomass Precursors In Complete Medium | Info    | ⬇ |
| Cellwall_biomass__hc                          | Errored | ⬇ |
| Cellwall_biomass__vc                          | Errored | ⬇ |
| DNA_biomass__hc                               | Errored | ⬇ |
| DNA_biomass__vc                               | Errored | ⬇ |
| Inorganicions_biomass__hc                     | Errored | ⬇ |
| Inorganicions_biomass__vc                     | Errored | ⬇ |
| Lipid_biomass__hc                             | Errored | ⬇ |
| Lipid_biomass__vc                             | Errored | ⬇ |
| Pigment_biomass__hc                           | Errored | ⬇ |
| Pigment_biomass__vc                           | Errored | ⬇ |
| Prot_biomass__hc                              | Errored | ⬇ |
| Prot_biomass__vc                              | Errored | ⬇ |
| RNA_biomass__hc                               | Errored | ⬇ |
| RNA_biomass__vc                               | Errored | ⬇ |
| Solpool_biomass__hc                           | Errored | ⬇ |
| Solpool_biomass__vc                           | Errored | ⬇ |
| biomass_eq_33047__hc                          | Errored | ⬇ |
| biomass_eq_33047__vc                          | Errored | ⬇ |
| carb_biomass__hc                              | Errored | ⬇ |
| carb_biomass__vc                              | Errored | ⬇ |

|                                                 |         |   |
|-------------------------------------------------|---------|---|
| Ratio of Direct Metabolites in Biomass Reaction | Info    | ⬇ |
| Cellwall_biomass__hc                            | Errored | ⬇ |
| Cellwall_biomass__vc                            | Errored | ⬇ |
| DNA_biomass__hc                                 | Errored | ⬇ |
| DNA_biomass__vc                                 | Errored | ⬇ |
| Inorganicions_biomass__hc                       | Errored | ⬇ |
| Inorganicions_biomass__vc                       | Errored | ⬇ |
| Lipid_biomass__hc                               | Errored | ⬇ |
| Lipid_biomass__vc                               | Errored | ⬇ |
| Pigment_biomass__hc                             | Errored | ⬇ |
| Pigment_biomass__vc                             | Errored | ⬇ |
| Prot_biomass__hc                                | Errored | ⬇ |
| Prot_biomass__vc                                | Errored | ⬇ |
| RNA_biomass__hc                                 | Errored | ⬇ |
| RNA_biomass__vc                                 | Errored | ⬇ |
| Solpool_biomass__hc                             | Errored | ⬇ |
| Solpool_biomass__vc                             | Errored | ⬇ |
| biomass_eq_33047__hc                            | Errored | ⬇ |
| biomass_eq_33047__vc                            | Errored | ⬇ |
| carb_biomass__hc                                | Errored | ⬇ |
| carb_biomass__vc                                | Errored | ⬇ |

|                                                |         |   |
|------------------------------------------------|---------|---|
| Number of Missing Essential Biomass Precursors | Info    | ⬇ |
| Cellwall_biomass__hc                           | Errored | ⬇ |
| Cellwall_biomass__vc                           | Errored | ⬇ |
| DNA_biomass__hc                                | Errored | ⬇ |
| DNA_biomass__vc                                | Errored | ⬇ |
| Inorganicions_biomass__hc                      | Errored | ⬇ |
| Inorganicions_biomass__vc                      | Errored | ⬇ |
| Lipid_biomass__hc                              | Errored | ⬇ |
| Lipid_biomass__vc                              | Errored | ⬇ |
| Pigment_biomass__hc                            | Errored | ⬇ |
| Pigment_biomass__vc                            | Errored | ⬇ |
| Prot_biomass__hc                               | Errored | ⬇ |
| Prot_biomass__vc                               | Errored | ⬇ |
| RNA_biomass__hc                                | Errored | ⬇ |
| RNA_biomass__vc                                | Errored | ⬇ |
| Solpool_biomass__hc                            | Errored | ⬇ |
| Solpool_biomass__vc                            | Errored | ⬇ |
| biomass_eq_33047__hc                           | Errored | ⬇ |
| biomass_eq_33047__vc                           | Errored | ⬇ |
| carb_biomass__hc                               | Errored | ⬇ |
| carb_biomass__vc                               | Errored | ⬇ |

### Energy Metabolism

|                                                   |         |   |
|---------------------------------------------------|---------|---|
| Non-Growth Associated Maintenance Reaction        | Errored | ⬇ |
| Growht-associated Maintenance in Biomass Reaction | Info    | ⬇ |
| Cellwall_biomass__hc                              | Errored | ⬇ |
| Cellwall_biomass__vc                              | Errored | ⬇ |
| DNA_biomass__hc                                   | Errored | ⬇ |
| DNA_biomass__vc                                   | Errored | ⬇ |
| Inorganicions_biomass__hc                         | Errored | ⬇ |
| Inorganicions_biomass__vc                         | Errored | ⬇ |
| Lipid_biomass__hc                                 | Errored | ⬇ |
| Lipid_biomass__vc                                 | Errored | ⬇ |
| Pigment_biomass__hc                               | Errored | ⬇ |
| Pigment_biomass__vc                               | Errored | ⬇ |
| Prot_biomass__hc                                  | Errored | ⬇ |
| Prot_biomass__vc                                  | Errored | ⬇ |
| RNA_biomass__hc                                   | Errored | ⬇ |
| RNA_biomass__vc                                   | Errored | ⬇ |
| Solpool_biomass__hc                               | Errored | ⬇ |
| Solpool_biomass__vc                               | Errored | ⬇ |
| biomass_eq_33047__hc                              | Errored | ⬇ |
| biomass_eq_33047__vc                              | Errored | ⬇ |
| carb_biomass__hc                                  | Errored | ⬇ |
| carb_biomass__vc                                  | Errored | ⬇ |
| Number of Reversible Oxygen-Containing Reactions  | 26      | ⬇ |
| Erroneous Energy-generating Cycles                | Info    | ⬇ |
| MNXM3                                             | Skipped | ⬇ |
| MNXM63                                            | Skipped | ⬇ |
| MNXM51                                            | Skipped | ⬇ |
| MNXM121                                           | Skipped | ⬇ |
| MNXM423                                           | Skipped | ⬇ |
| MNXM6                                             | Skipped | ⬇ |
| MNXM10                                            | Skipped | ⬇ |
| MNXM38                                            | Skipped | ⬇ |
| MNXM208                                           | Skipped | ⬇ |
| MNXM191                                           | Skipped | ⬇ |
| MNXM223                                           | Skipped | ⬇ |
| MNXM7517                                          | Skipped | ⬇ |
| MNXM12233                                         | Skipped | ⬇ |
| MNXM558                                           | Skipped | ⬇ |
| MNXM21                                            | Skipped | ⬇ |
| MNXM89557                                         | Skipped | ⬇ |

### Network Topology

|                                           |     |   |
|-------------------------------------------|-----|---|
| Universally Blocked Reactions             | 563 | ⬇ |
| Orphan Metabolites                        | 156 | ⬇ |
| Dead-end Metabolites                      | 149 | ⬇ |
| Stoichiometrically Balanced Cycles        | 0   | ⬇ |
| Metabolite Production In Complete Medium  | 654 | ⬇ |
| Metabolite Consumption In Complete Medium | 673 | ⬇ |

### Matrix Conditioning

|                                     |      |   |
|-------------------------------------|------|---|
| Ratio Min/Max Non-Zero Coefficients | 0.00 | ⬇ |
| Independent Conservation Relations  | 222  | ⬇ |
| Rank                                | 1589 | ⬇ |
| Degrees Of Freedom                  | 256  | ⬇ |

### Experimental Data Comparison

|                   |         |   |
|-------------------|---------|---|
| Growth Prediction | Skipped | ⬇ |
|-------------------|---------|---|
